# Supplementary material
Source: MDPI journal article supplement (https://www.mdpi.com/2306-5729/5/3/74)
Supplement: s1 [file s1]

Table 1.
MSE Stark  Full Width at Half Intensity Maximum (WMSE) calculated for Co II transitions for five different temperature values (Majlinger Z., Dimitrijević M. S., Srećković V. A., MNRAS 2020,  496, 5584). Electron density of 10E+23 m-3 is used.

Transitions                    λ(A)                       WMSE(A)                                    
T(K)                                   5000        10000       20000       50000       100000
  
(2G)4s a3G - (2G)4p y3Fo     2370.0  0.5026E-01  0.3554E-01  0.2513E-01  0.1589E-01  0.1144E-01 
(2G)4s a3G - (2G)4p y3Go     2326.8  0.5299E-01  0.3747E-01  0.2650E-01  0.1676E-01  0.1207E-01 
(2G)4s a3G - (2G)4p y3Ho     2404.1  0.6027E-01  0.4262E-01  0.3013E-01  0.1906E-01  0.1381E-01 
(2G)4s b1G - (2G)4p y3Fo     2446.8  0.5557E-01  0.3929E-01  0.2778E-01  0.1757E-01  0.1269E-01 
(2G)4s b1G - (2G)4p y3Go     2547.5  0.6506E-01  0.4600E-01  0.3253E-01  0.2057E-01  0.1497E-01 
(2G)4s b1G - (2G)4p y3Ho     2511.9  0.6818E-01  0.4821E-01  0.3409E-01  0.2156E-01  0.1571E-01 
(2D2)4s b1D -(2D2)4p y1Po    2308.2  0.4696E-01  0.3321E-01  0.2348E-01  0.1485E-01  0.1065E-01 
(2D2)4s b1D -(2D2)4p y1Do    2412.3  0.5872E-01  0.4152E-01  0.2936E-01  0.1857E-01  0.1343E-01 
(2D2)4s b1D -(2D2)4p y1Fo    2419.2  0.6714E-01  0.4747E-01  0.3357E-01  0.2123E-01  0.1543E-01 
(2D2)4s a3D -(2D2)4p x1Po    2251.8  0.4312E-01  0.3049E-01  0.2156E-01  0.1364E-01  0.9756E-02 
(2D2)4s a3D -(2D2)4p w1Do    2424.0  0.5676E-01  0.4014E-01  0.2838E-01  0.1795E-01  0.1298E-01 
(2D2)4s a3D -(2D2)4p x1Fo    2360.4  0.6158E-01  0.4354E-01  0.3079E-01  0.1947E-01  0.1410E-01 
(4P)4s b3P - (4P)4p z3So     2613.4  0.5369E-01  0.3797E-01  0.2685E-01  0.1698E-01  0.1220E-01 
(4P)4s b3P - (4P)4p y3Do     2533.2  0.8066E-01  0.5704E-01  0.4033E-01  0.2551E-01  0.1871E-01 
(4P)4s b3P - (4P)4p y3Po     2435.9  0.6031E-01  0.4265E-01  0.3016E-01  0.1907E-01  0.1381E-01 
(2P)4s c3P - (2P)4p z3Po     2496.6  0.5972E-01  0.4223E-01  0.2986E-01  0.1889E-01  0.1371E-01 
(2P)4s c3P - (2P)4p x3Do     2348.3  0.6622E-01  0.4682E-01  0.3311E-01  0.2094E-01  0.1519E-01 
(2P)4s c3P - (2P)4p y3So     2215.9  0.3987E-01  0.2819E-01  0.1993E-01  0.1261E-01  0.9018E-02 
(2P)4s a1P - (2P)4p z1Do     2523.7  0.7837E-01  0.5542E-01  0.3919E-01  0.2478E-01  0.1817E-01 
(2P)4s a1P - (2P)4p 1So      2479.8  0.7578E-01  0.5359E-01  0.3789E-01  0.2396E-01  0.1752E-01 
(2P)4s a1P - (2P)4p z1Po     2311.0  0.5362E-01  0.3792E-01  0.2681E-01  0.1696E-01  0.1221E-01 
(2H)4s a3H - (2H)4p z3Go     2423.0  0.5287E-01  0.3739E-01  0.2644E-01  0.1672E-01  0.1206E-01 
(2H)4s a3H - (2H)4p z3Io     2431.3  0.6054E-01  0.4281E-01  0.3027E-01  0.1914E-01  0.1388E-01 
(2H)4s a3H - (2H)4p y3Ho     2261.2  0.5030E-01  0.3556E-01  0.2515E-01  0.1591E-01  0.1143E-01 
(2H)4s a1H - (2H)4p y1Go     2348.5  0.5224E-01  0.3694E-01  0.2612E-01  0.1652E-01  0.1189E-01 
(2H)4s a1H - (2H)4p y1Ho     2282.6  0.5330E-01  0.3769E-01  0.2665E-01  0.1686E-01  0.1213E-01 
(4F)4s a5F - (4F)4p z5Fo     2406.2  0.5523E-01  0.3905E-01  0.2762E-01  0.1747E-01  0.1262E-01 
(4F)4s a5F - (4F)4p z5Do     2333.1  0.5083E-01  0.3594E-01  0.2541E-01  0.1607E-01  0.1157E-01 
(4F)4s a5F - (4F)4p z5Go     2301.6  0.5212E-01  0.3685E-01  0.2606E-01  0.1648E-01  0.1186E-01 
(4F)5s e5F - (4F)5p 5Go      8223.5  3.185       2.252       1.593       1.201       1.196      
(4F)4s a5F - (4F)5p 5Go      1079.4  0.3461E-01  0.2448E-01  0.1731E-01  0.1266E-01  0.11418E-1 
(4F)4p z5Fo - (4F)5s 5F      2569.4  0.1395      0.9865E-01  0.6975E-01  0.4989E-01  0.4414E-01 
(4F)4p z5Do - (4F)5s 5F      2658.2  0.1451      0.1026      0.7257E-01  0.5208E-01  0.4622E-01 
(4F)4p z5Go - (4F)5s 5F      2700.3  0.1597      0.1129      0.7984E-01  0.5688E-01  0.5000E-01 
(4F)4s b3F  - (4F)4p 3Do     2581.8  0.5177E-01  0.3661E-01  0.2589E-01  0.1637E-01  0.1176E-01 
(4F)4s b3F  - (4F)4p 3Fo     2516.1  0.6499E-01  0.4596E-01  0.3250E-01  0.2055E-01  0.1493E-01 
(4F)4s b3F  - (4F)4p 3Go     2408.8  0.5399E-01  0.3817E-01  0.2699E-01  0.1707E-01  0.1230E-01 
(4F)5s e3F  - (4F)5p 5Do     10624   4.292       3.035       2.170       1.670       1.660      
(4F)5s e3F  - (4F)5p 5Fo     9969    4.479       3.167       2.251       1.780       1.768      
(4F)5s e3F  - (4F)5p 5Go     9519    4.586       3.243       2.293       1.864       1.789      
(4F)4s b3F  - (4F)5p 3Go     1148.5  0.4662E-01  0.3297E-01  0.2331E-01  0.1776E-01  0.1759E-01 
(4F)4s b3F  - (4F)5p 3Fo     1145.8  0.4291E-01  0.3034E-01  0.2146E-01  0.1636E-01  0.1602E-01 
(4F)4s b3F  - (4F)5p 3Do     1144.7  0.3782E-01  0.2675E-01  0.1891E-01  0.1422E-01  0.1388E-01 
(4F)4p z3Go - (4F)5s e3F     2709.0  0.1852      0.1310      0.9262E-01  0.6718E-01  0.6061E-01 
(4F)4p z3Fo - (4F)5s e3F     2785.4  0.1709      0.1209      0.8545E-01  0.6087E-01  0.5391E-01 
(4F)4p z3Do - (4F)5s e3F     2929.8  0.1627      0.1151      0.8136E-01  0.5676E-01  0.4920E-01 


Table 2.
Coefficients for fitting formula log w(T) = a + b log T + c log2 T (Sahal-Bréchot S.,  Dimitrijević M.S., Ben Nessib N.,  2011, Baltic
Astron., 20, 523) where w(T) is Stark width in A, and T  temperature in kelvins. The fitting parameters a, b and c are calculated for electron density of 10E+23 m-3 and tabulated for all lines in Table 1. Although Tab. 1 presents electron-impact widths for temperatures of 5000 K, 10000 K, 20000 K, 50000 K and 100000 K only, interpolation parameters are calculated for interval from 5000 K to 200000 K and thus can be used for any further calculations of Stark widths within this range of temperatures.

Transitions                   λ(A)   a        b         c       

(2G)4s a3G   - (2G)4p y3Fo   2370.0  1.59957  -0.99996  0.05902 
(2G)4s a3G   - (2G)4p y3Go   2326.8  1.71162  -1.04240  0.06403 
(2G)4s a3G   - (2G)4p y3Ho   2404.1  1.84208  -1.07850  0.06837 
(2G)4s b1G - (2G)4p y3Fo     2446.8  1.73637  -1.04462  0.06433 
(2G)4s b1G - (2G)4p y3Go     2547.5  1.93042  -1.10520  0.07158 
(2G)4s b1G - (2G)4p y3Ho     2511.9  2.01712  -1.13688  0.07533 
(2D2)4s b1D - (2D2)4p y1Po   2308.2  1.60236  -1.01483  0.06071 
(2D2)4s b1D - (2D2)4p y1Do   2412.3  1.82946  -1.07766  0.06824 
(2D2)4s b1D - (2D2)4p y1Fo   2419.2  2.00560  -1.13425  0.07497 
(2D2)4s a3D - (2D2)4p x1Po   2251.8  1.48404  -0.97603  0.05612 
(2D2)4s a3D - (2D2)4p w1Do   2424.0  1.74483  -1.04446  0.06434 
(2D2)4s a3D - (2D2)4p x1Fo   2360.4  1.89552  -1.09933  0.07080 
(4P)4s b3P -  (4P)4p z3So    2613.4  1.52274  -0.94973  0.05310 
(4P)4s b3P -  (4P)4p y3Do    2533.2  2.25081  -1.21401  0.08450 
(4P)4s b3P -  (4P)4p y3Po    2435.9  1.86806  -1.09060  0.06978 
(2P)4s c3P -  (2P)4p z3Po    2496.6  1.79819  -1.05986  0.06622 
(2P)4s c3P -  (2P)4p x3Do    2348.3  1.99068  -1.12977  0.07441 
(2P)4s c3P -  (2P)4p y3So    2215.9  1.43500  -0.96884  0.05526 
(2P)4s a1P -  (2P)4p z1Do    2523.7  2.20154  -1.19647  0.08243 
(2P)4s a1P - (2P)4p 1So      2479.8  2.15636  -1.18157  0.08063 
(2P)4s a1P - (2P)4p z1Po     2311.0  1.76736  -1.06636  0.06684 
(2H)4s a3H - (2H)4p z3Go     2423.0  1.63534  -1.00682  0.05988 
(2H)4s a3H - (2H)4p z3Io     2431.3  1.84304  -1.07808  0.06832 
(2H)4s a3H - (2H)4p y3Ho     2261.2  1.69006  -1.04262  0.06402 
(2H)4s a1H - (2H)4p y1Go     2348.5  1.70875  -1.04383  0.06418 
(2H)4s a1H - (2H)4p y1Ho     2282.6  1.79317  -1.07979  0.06841 
(4F)4s a5F - (4F)4p z5Fo     2406.2  1.70341  -1.03041  0.06268 
(4F)4s a5F - (4F)4p z5Do     2333.1  1.63779  -1.01577  0.06088 
(4F)4s a5F - (4F)4p z5Go     2301.6  1.69809  -1.03922  0.06363 
(4F)5s e5F - (4F)5p 5Go      8223.5  6.17653  -2.41088  0.23770 
(4F)4s a5F - (4F)5p 5Go      1079.4  2.01187  -1.34472  0.10949 
(4F)4p z5Fo - (4F)5s 5F      2569.4  4.17608  -2.07526  0.19401 
(4F)4p z5Do - (4F)5s 5F      2658.2  4.21517  -2.08719  0.19562 
(4F)4p z5Go - (4F)5s 5F      2700.3  4.20460  -2.05891  0.19181 
(4F)4s b3Fo - (4F)4p 3Do     2581.8  1.51781  -0.95483  0.05369 
(4F)4s b3F  - (4F)4p 3Fo     2516.1  1.95524  -1.11699  0.07293 
(4F)4s b3F  - (4F)4p 3Go     2408.8  1.73277  -1.04855  0.06475 
(4F)5s e3F  - (4F)5p 5Do     10624   6.22399  -2.38153  0.23564 
(4F)5s e3F  - (4F)5p 5Fo     9969    6.09300  -2.31637  0.22877 

(4F)5s e3F  - (4F)5p 5Go     9519    6.00299  -2.27062  0.22365 
(4F)4s b3F  - (4F)5p 3Go     1148.5  4.22723  -2.35867  0.23189 
(4F)4s b3F  - (4F)5p 3Fo     1145.8  4.16586  -2.34544  0.23017 
(4F)4s b3F  - (4F)5p 3Do     1144.7  4.18926  -2.37799  0.23336 
(4F)4p z3Go - (4F)5s e3F     2709.0  4.43387  -2.14589  0.20324 
(4F)4p z3Fo - (4F)5s e3F     2785.4  4.34314  -2.11157  0.19813 
(4F)4p z3Do - (4F)5s e3F     2929.8  4.26085  -2.07376  0.19245 
